# Supplementary material
Source: ML conference proceedings conference paper supplement (https://openaccess.thecvf.com/content/CVPR2023/html/Kant_Invertible_Neural_Skinning_CVPR_2023_paper.html)
Supplement: Supplementary file 3 [file Kant_Invertible_Neural_Skinning_CVPR_2023_supplemental.zip]

Archive with 8 entries (7 files):
- 3954_invertible_neural_skinning-Supplementary Material (1)/
- __MACOSX/._3954_invertible_neural_skinning-Supplementary Material (1)
- 3954_invertible_neural_skinning-Supplementary Material (1)/.DS_Store
- __MACOSX/3954_invertible_neural_skinning-Supplementary Material (1)/._.DS_Store
- 3954_invertible_neural_skinning-Supplementary Material (1)/supplementary.pdf
- __MACOSX/3954_invertible_neural_skinning-Supplementary Material (1)/._supplementary.pdf
- 3954_invertible_neural_skinning-Supplementary Material (1)/qual-video.mp4
- __MACOSX/3954_invertible_neural_skinning-Supplementary Material (1)/._qual-video.mp4
